# Supplementary material
Source: PubMed Central journal article supplement (PMC11152320)
Supplement: NIHMS1990408-supplement-Supplemental_figures.pdf [file NIHMS1990408-supplement-Supplemental_figures.pdf]

# 1 Supplemental information

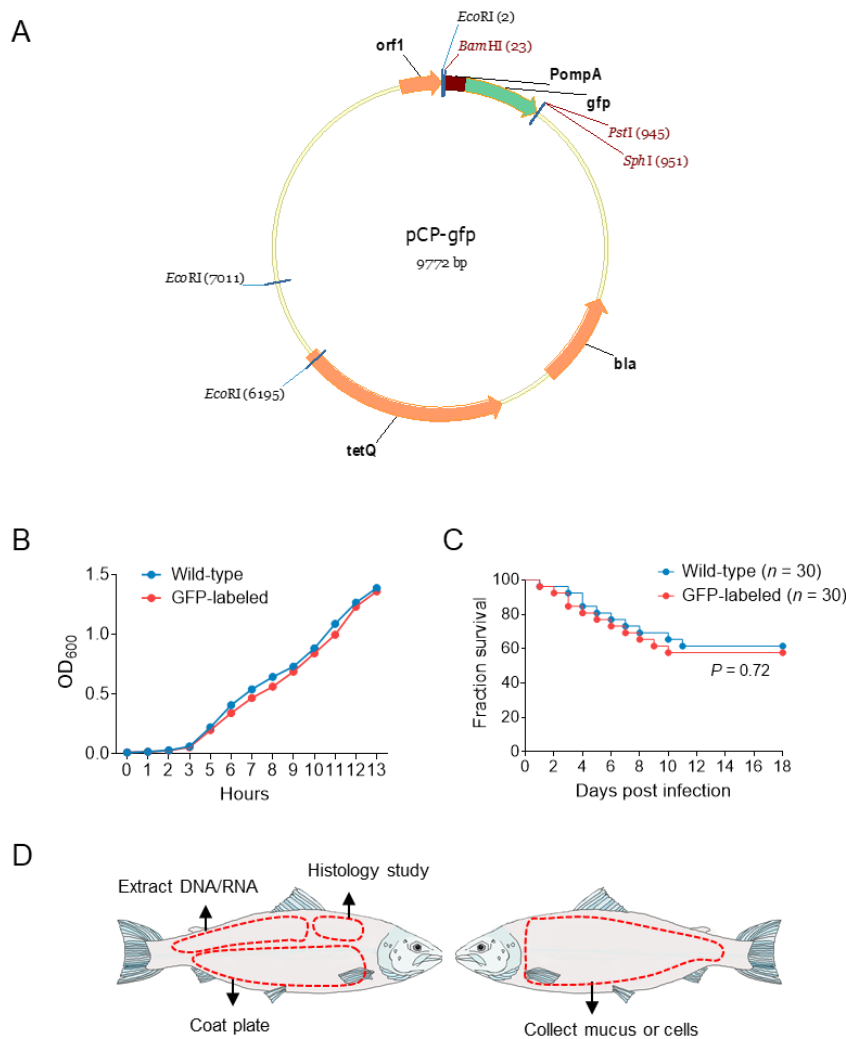

2

## 3 Supplemental Fig. 1. Construction of GFP-*F. columnare* G<sub>4</sub> strain and sampling locations of

4 trout skin. (A) Map of the plasmid pCP23-gfp. (B) Growth curves for wild-type *F. columnare* and

5 the GFP-*F. columnare*. (C) Survival curves of fish infected with wild-type G<sub>4</sub> and the GFP-*F.*

6 *columnare* (n = 30). (D) The anterior dorsal skin was sampled for histology study, the posterior

7 dorsal skin was sampled for extracting DNA or RNA, the ventral skin was sampled for coating plates,

8 and the whole unilateral skin was sampled for collecting mucus or cells. Data are representative of at

9 least three independent experiments (mean ± SEM).

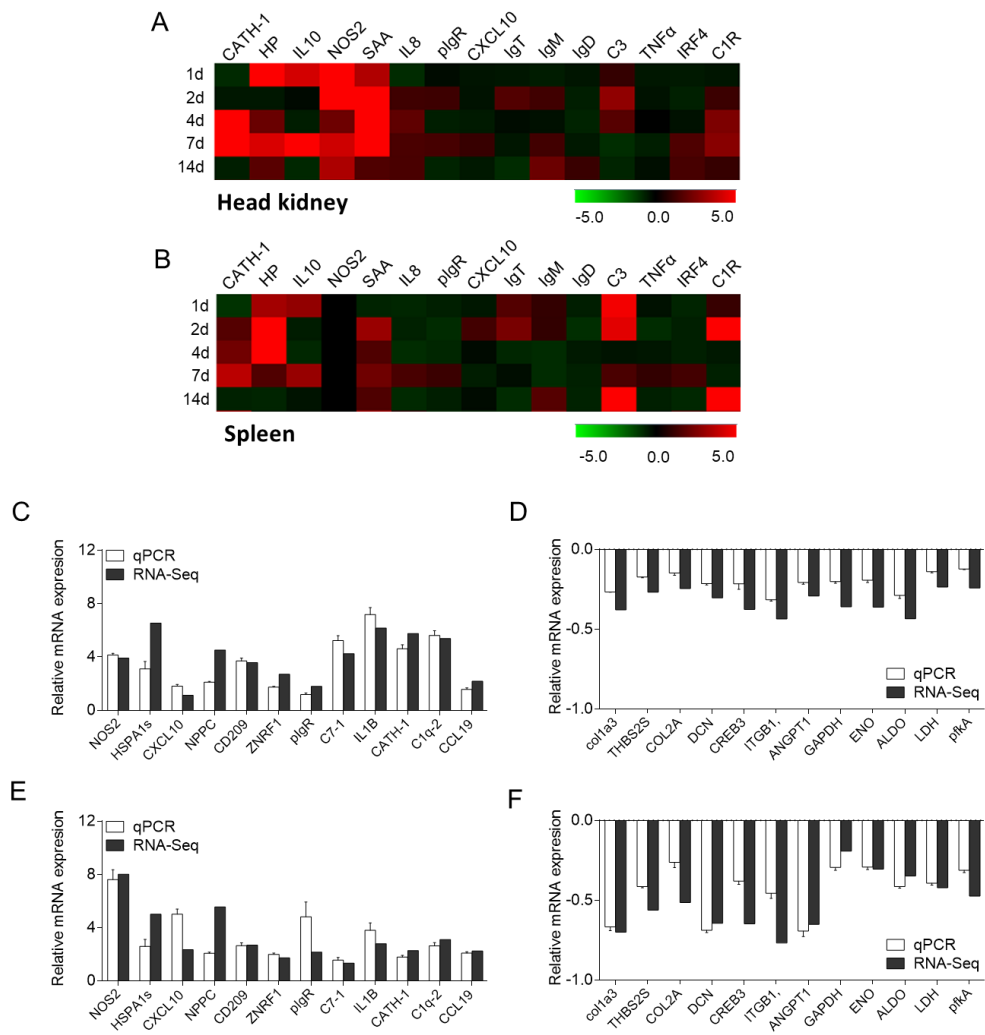

10

11 **Supplemental Fig. 2. Immune responses in trout spleen and head kidney following *F.***  
 12 ***columnare* infection, and validation of transcriptomic data by PCR.** (A and B) Heat map  
 13 illustrates results from qRT-PCR of mRNAs for selected immune markers in *F. columnare*-infected  
 14 fish versus control fish measured at 1, 2, 4, 7, and 14 dpi in trout head kidney (A) and spleen (B) ( $n =$   
 15 6). Data are representative of three different independent experiments (mean  $\pm$  SEM). (C–F)  
 16 Transcriptomic differential expressed genes in experimental groups at 2 (C and D) and 14 days (E  
 17 and F) post infection were randomly chosen and detected using qPCR to validate RNA-seq. Positive  
 18 numbers in the Y axis mean up-regulated, while negative values mean down-regulated ( $n = 6$ ). Data  
 19 are representative of three different independent experiments (mean  $\pm$  SEM).

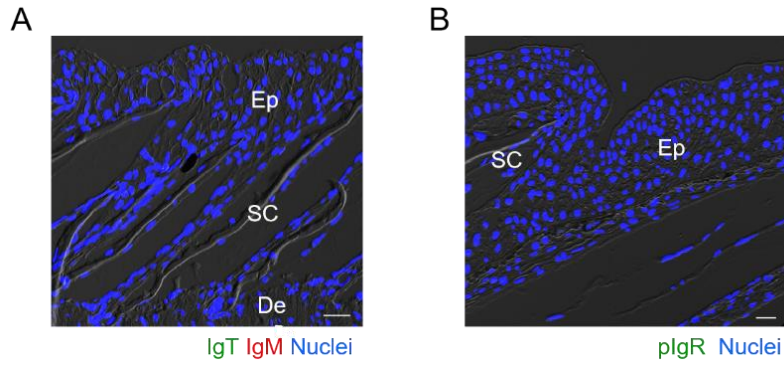

20

21 **Supplemental Fig. 3. Isotype control staining for anti-IgT, anti-IgM and anti-pIgR antibodies**

22 **in trout skin paraffin sections.** (A and B) Differential interference contrast images of skin paraffin

23 sections from control fish, with merged staining of isotype control antibodies for anti-trout IgT pAb

24 (green) and anti-trout IgM mAbs (red) (A); or for anti-trout pIgR pAb (green) (B). Nuclei were

25 stained with DAPI (blue). Ep: epidermis, Sc: scale, De: dermis. Scale bars, 20  $\mu$ m. Data are

26 representative of at least three different independent experiments.

27
